# Supplementary material for: Physical activity with person-centered guidance supported by a digital platform or with telephone follow-up for persons with chronic widespread pain: Health economic considerations along a randomized controlled trial
Source: publisher site journal article supplement (doi:10.1515/sjpain-2023-0131), 2024-01-01
Supplement: Supplementary file 1 [file sjpain-2023-0131_sm.pdf]

# Supplementary material

**Table S1:** Time data reported by the healthcare units for 1 year

| Unit                                           | A                      | B      | C     | D     |
|------------------------------------------------|------------------------|--------|-------|-------|
|                                                | Number of participants |        |       |       |
|                                                | 14                     | 31     | 15    | 9     |
|                                                | Reported hours, total  |        |       |       |
| Patient visits/phonecalls (h)                  | 35                     | 45     | 24    | 18    |
| Administrative work related to patient (h)     | 2:20                   | 6      | 10    | 1:20  |
| Preparatory work before visits/ phonecalls (h) | 2:20                   | 5      | 2     | 1:20  |
| Documentation (h)                              | 2:20                   | 5      | 2     | 4     |
| Use eHealth platform (h)                       | 34:40                  | 52     | 34:40 | 27:30 |
| Rebookings (h)                                 | 10                     | 10     | 5     | 5     |
| Solving problems with the eHealth platform (h) | 5                      | 6:20   | 4     | 5     |
| Total time (h)                                 | 91:40                  | 129:20 | 81:40 | 63:15 |
